# Supplementary material for: A dietary fatty acid counteracts neuronal mechanical sensitization
Source: PubMed Central journal article supplement (PMC7305179; doi:10.1038/s41467-020-16816-2), 2020-06-19
Supplement: 41467_2020_16816_MOESM3_ESM.pdf [file 41467_2020_16816_MOESM3_ESM.pdf]

## Animals and other organisms

---

Policy information about [studies involving animals](#); [ARRIVE guidelines](#) recommended for reporting animal research

Laboratory animals

8-12-week-old male C57BL/6 mice (*Mus musculus*).

Wild animals

No wild animals were used in the study.

Field-collected samples

No field collected samples were used in the study.

Ethics oversight

Protocols for mice have been reviewed and approved by the IACUC. The University of Tennessee maintains an AALAC-accredited facility that is staffed by 3 full time veterinarians, 2 of whom are board-certified in laboratory animal care. Protocols for human iPSC-derived neurons were reviewed and approved by approved by the IRB at the National Institute of Neurological Disorders and Stroke Intramural Research Program.

Note that full information on the approval of the study protocol must also be provided in the manuscript.
